# Supplementary material for: Evaluation of VIDAS® Diagnostic Assay Prototypes Detecting Dengue Virus NS1 Antigen and Anti-Dengue Virus IgM and IgG Antibodies
Source: MDPI journal article supplement (doi:10.3390/diagnostics11071228), 2021-07-07
Supplement: s1 [file s1]

## Supplementary Tables

**Table S1. Positive agreement of the respective NS1 antigen assays with RT-PCR calculated on the common cohort (N=55)**

| Reference test | Population | VIDAS |                        | FOCUS |                      | RDT <sup>a</sup> |                      |
|----------------|------------|-------|------------------------|-------|----------------------|------------------|----------------------|
|                |            | n/N   | %<br>[95% CI]          | n/N   | %<br>[95% CI]        | n/N              | %<br>[95% CI]        |
| RT-PCR         | Total      | 47/55 | 85.5%<br>[73.8-92.4]   | 46/55 | 83.6%<br>[71.7-91.1] | 40/55            | 72.7%<br>[59.8-82.7] |
|                | Adults     | 30/38 | 78.9%<br>[63.7-88.9]   | 30/38 | 78.9%<br>[63.7-88.9] | 24/38            | 63.2%<br>[47.3-76.6] |
|                | Children   | 17/17 | 100.0%<br>[80.5-100.0] | 16/17 | 94.1%<br>[73.0-99.0] | 16/17            | 94.1%<br>[73.0-99.0] |

<sup>a</sup>SD BIOLINE Dengue Duo Rapid Test (Dengue NS1 Ag); n/N is the ratio of the number of samples positive for the respective immunoassays (VIDAS®, FOCUS, RDT) to the number of RT-PCR-positive samples; Fisher's Exact Test between adults and children: VIDAS® (p=0.048), FOCUS (p=0.247) and RDT (p=0.022); McNemar VIDAS® vs. Focus (p=0.564); McNemar VIDAS® vs. RDT (p=0.008); Abbreviations: CI, confidence interval; RDT, rapid diagnostic test.

**Table S2. Concordance of VIDAS® Dengue NS1 Ag and competitor assays calculated on the common cohort (N=89)**

| Reference test                              | Population | Positive Agreement |                        | Negative Agreement |                      | Overall Agreement |                      |
|---------------------------------------------|------------|--------------------|------------------------|--------------------|----------------------|-------------------|----------------------|
|                                             |            | n/N                | %<br>[95% CI]          | n/N                | %<br>[95% CI]        | n/N               | %<br>[95% CI]        |
| <b>Dengue NS1 Antigen DxSelect™ (Focus)</b> | Total      | 78/80              | 97.5%<br>[91.3-99.7]   | 7/9                | 77.8%<br>[45.3-93.7] | 85/89             | 95.5%<br>[88.9-98.8] |
|                                             | Adults     | 47/48              | 97.9%<br>[88.9-99.9]   | 7/8                | 87.5%<br>[52.9-97.8] | 54/56             | 96.4%<br>[87.7-99.6] |
|                                             | Children   | 31/32              | 96.9%<br>[83.8-99.9]   | 0/1                | 0.0%<br>[0.0-97.5]   | 31/33             | 93.9%<br>[80.4-98.3] |
| <b>NS1 RDT<sup>a</sup></b>                  | Total      | 70/70              | 100.0%<br>[94.9-100.0] | 9/19               | 47.4%<br>[27.3-68.3] | 79/89             | 88.8%<br>[80.5-93.8] |
|                                             | Adults     | 41/41              | 100.0%<br>[91.4-100.0] | 8/15               | 53.3%<br>[30.1-75.2] | 49/56             | 87.5%<br>[76.4-93.8] |
|                                             | Children   | 29/29              | 100.0%<br>[88.1-100.0] | 1/4                | 25.0%<br>[4.6-69.9]  | 30/33             | 90.9%<br>[76.4-96.9] |

<sup>a</sup>SD BIOLINE Dengue Duo Rapid Test (Dengue NS1 Ag); n/N is the ratio of the number of VIDAS® assays in agreement with the competitor assays (Reference test) to the total number of competitor assays (positive, negative and overall, respectively); Fisher's Exact Test between adults and children on overall agreement: VIDAS® vs. FOCUS (p=0.625) and VIDAS® vs. RDT (p=0.739); Abbreviations: CI, confidence interval; RDT, rapid diagnostic test.

**Table S3. Concordance of VIDAS® Anti-Dengue IgM and competitor assays calculated on the common cohort (N=83)**

| Reference test                         | Population | Positive Agreement |                      | Negative Agreement |                      | Overall Agreement |                      |
|----------------------------------------|------------|--------------------|----------------------|--------------------|----------------------|-------------------|----------------------|
|                                        |            | n/N                | %<br>[95% CI]        | n/N                | %<br>[95% CI]        | n/N               | %<br>[95% CI]        |
| <b>Panbio Dengue IgM Capture ELISA</b> | Total      | 38/45              | 84.4%<br>[71.2-92.3] | 24/38              | 63.2%<br>[47.3-76.6] | 62/83             | 74.7%<br>[64.4-82.8] |
|                                        | Adults     | 24/29              | 82.8%<br>[65.5-92.4] | 15/24              | 62.5%<br>[42.7-78.8] | 39/53             | 73.6%<br>[60.4-83.6] |
|                                        | Children   | 14/16              | 87.5%<br>[64.0-96.5] | 9/14               | 64.3%<br>[38.8-83.7] | 23/30             | 76.7%<br>[59.1-88.2] |
| <b>IgM RDT<sup>a</sup></b>             | Total      | 31/36              | 86.1%<br>[71.3-93.9] | 26/47              | 55.3%<br>[41.2-68.6] | 57/83             | 68.7%<br>[58.1-77.6] |
|                                        | Adults     | 21/25              | 84.0%<br>[65.3-93.6] | 16/28              | 57.1%<br>[39.1-73.5] | 37/53             | 69.8%<br>[56.5-80.5] |
|                                        | Children   | 10/11              | 90.9%<br>[62.3-98.4] | 10/19              | 52.6%<br>[31.7-72.7] | 20/30             | 66.7%<br>[48.8-80.8] |

<sup>a</sup>SD BIOLINE Dengue Duo Rapid Test (Dengue IgG/IgM); n/N is the ratio of the number of VIDAS® assays in agreement with the competitor assays (Reference test) to the total number of competitor assays (positive, negative and overall, respectively); Chi-square Test between adults and children on overall agreement: VIDAS® vs. Panbio (p=0.756) and VIDAS® vs. RDT (p=0.767); Abbreviations: CI, confidence interval; RDT, rapid diagnostic test.

**Table S4. Concordance of VIDAS® Anti-Dengue IgG and competitor assays calculated on the common cohort (N=83)**

| Reference test                          | Population | Positive Agreement |                      | Negative Agreement |                      | Overall Agreement |                      |
|-----------------------------------------|------------|--------------------|----------------------|--------------------|----------------------|-------------------|----------------------|
|                                         |            | n/N                | %<br>[95% CI]        | n/N                | %<br>[95% CI]        | n/N               | %<br>[95% CI]        |
| <b>Panbio Dengue IgG Indirect ELISA</b> | Total      | 51/67              | 76.1%<br>[64.7-84.7] | 12/16              | 75.0%<br>[50.5-89.8] | 63/83             | 75.9%<br>[65.7-83.8] |
|                                         | Adults     | 34/43              | 79.1%<br>[64.8-88.6] | 7/10               | 70.0%<br>[39.7-89.2] | 41/53             | 77.4%<br>[64.5-86.5] |
|                                         | Children   | 17/24              | 70.8%<br>[50.8-85.1] | 5/6                | 83.3%<br>[43.6-97.0] | 22/30             | 73.3%<br>[55.6-85.8] |
| <b>IgG RDT<sup>a</sup></b>              | Total      | 33/37              | 89.2%<br>[75.3-95.7] | 24/46              | 52.2%<br>[38.1-65.9] | 57/83             | 68.7%<br>[58.1-77.6] |
|                                         | Adults     | 27/29              | 93.1%<br>[78.0-98.1] | 14/24              | 58.3%<br>[38.8-75.5] | 41/53             | 77.4%<br>[64.5-86.5] |
|                                         | Children   | 6/8                | 75.0%<br>[40.9-92.9] | 10/22              | 45.5%<br>[26.9-65.3] | 16/30             | 53.3%<br>[36.1-69.8] |

<sup>a</sup>SD BIOLINE Dengue Duo Rapid Test (Dengue IgG/IgM); n/N is the ratio of the number of VIDAS® assays in agreement with the competitor assays (Reference test) to the total number of competitor assays (positive, negative and overall, respectively); Chi-square Test between adults and children on overall agreement: VIDAS® vs. Panbio (p=0.680) and VIDAS® vs. RDT (p=0.023); Abbreviations: CI, confidence interval; RDT, rapid diagnostic test.
